# Supplementary material
Source: publisher figshare collection journal article supplement (https://sage.figshare.com/ndownloader/files/16832384)
Supplement: Supplementary file 1 [file 16832384]

## Sheet: Sheet1
						Polymorphisms
Cat	FIP status	Breed	age (mth)	Diagnosis	FCoV status for non-FIP	IFN 230	IFN 253	IFN 308	IFN 333	IFNy 401	IFNy 408	IFNy 428	IFN 468	IFN 523	IFN 524	TNFa 421	CD209 1900	CD209 2276	CD209 2392	CD209 2713	CD209 2718
38	NEG	Maine Coon	12	Fibrous connective tissue disorder	Positive faeces	TT	GG	AA	AA	TT	TT	CC	TT	CC	AA	CC	GG	CC	GG	CC	CT
56	NEG	Birman	165	Pyothorax and pyogranulomatous bronchopneumonia	Positive tissue	TT	GG	AA	AA	CC	CC	CC	TT	TT	GG	CC	GG	CC	GA	CC	CC
59	NEG	Devon Rex	96	Chronic enteropathy	Positive faeces	TT	GG	AA	AA	TT	TT	CC	TT	CC	AA	CC	GG	CC	GG	CC	CC
77	NEG	Persian cross	67	Metastatic adenocarcinoma	Negative	TT	GG	AA	AA	CC	CC	CC	TT	TT	GG	CC	GG	CC	AA	CC	TT
105	NEG	Bengal	84	Jejunal constriction	Negative	TT	GG	AA	AA	TT	TT	CC	TT	CC	GG	CC	GG	CC	GA	CC	CC
124	NEG	British Short Hair	126	Chronic intervertebral disease	Negative	TT	GC	AA	AA	CT	CT	CC	CT	CT	GG	CC	GG	CC	GA	CT	CT
125	NEG	Ragdoll	4	Severe interstitial pneumonia	Positive tissue	TT	GC	AA	GA	CC	CC	CC	TT	CT	GG	CC	GG	CC	GG	CT	CC
126	NEG	Ragdoll	36	Hypertrophic cardiomyopathy / congestive heart failure	Positive faeces	TT	GC	AA	GA	CC	CC	CC	TT	CT	GG	CC	GG	CC	GG	CT	CT
132	NEG	Havana	59	Lymphoma	Negative	TT	GG	AA	GG	CC	CC	CC	CC	CC	GG	CC	GG	CC	GG	CC	CC
133	NEG	Siamese	72	Lymphoma	Negative	TT	GC	AA	AA	TT	TT	CC	CT	CT	GG	CC	GG	CC	GG	CC	CC
GR57	NEG	Tiffanie	180	Alive	Serology negative	TT	GG	AA	GA	CT	CT	CC	CT	CC	GA	CT	GG	CC	GA	CC	CT
GR58	NEG	Bengal	136	Alive	Not available	TT	GG	AA	AA	TT	TT	CC	TT	CC	GG	CC	GG	CC	GG	CC	CC
GR59	NEG	Bengal	136	Alive	Not available	TT	GG	AA	GA	CT	CT	CC	CT	CC	GA	CC	GG	CC	GA	CC	CC
31	POS	Burmese	3	FIP		CT	GC	AC	AA	CT	CT	CC	CT	CT	GG	CC	GG	CC	GG	CT	CC
32	POS	Abyssinian	4	FIP		TT	GG	AA	GA	CT	CT	CT	CC	CC	GG	CC	GG	CC	GG	CC	CC
53	POS	British Short Hair	2	FIP		TT	GC	AA	GA	CT	CT	CT	CC	CT	GG	CC	GG	CC	GA	CC	CT
55	POS	Ragdoll	8	FIP		TT	GC	AA	GA	CT	CT	CC	TT	CC	GA	CC	GG	CT	GA	CT	CC
61	POS	British Blue	5	FIP		TT	GC	AA	AA	CT	CT	CC	CT	CT	GG	CC	GG	CC	GG	CC	CT
62	POS	British Short Hair	5	FIP		TT	GG	AA	GG	CC	CC	CC	CC	CC	GG	CC	GG	CC	GG	CC	CC
66	POS	Ragdoll	7	FIP		TT	GG	AA	AA	TT	TT	CC	TT	CC	AA	CC	GG	CC	GG	CT	CC
70	POS	British Short Hair	22	FIP		TT	GC	AA	AA	CT	CT	CC	CT	CT	GG	CC	GG	CC	GA	CC	CT
73	POS	Maine Coon	15	FIP		TT	CC	AA	AA	TT	TT	CC	CC	TT	GG	CC	GG	CC	GG	CT	CC
75	POS	Ragdoll	8	FIP		TT	GC	AA	GA	CT	CT	CT	CT	CC	GG	CC	GG	CC	GG	CC	CT
79	POS	British Short Hair	3	FIP		TT	GC	AA	AA	CT	CT	CC	CT	CT	GA	CT	GG	CC	GG	CC	CC
85	POS	Ragdoll	9	FIP		TT	GC	AA	GA	CT	CT	CT	CT	CC	GG	CC	GG	CC	AA	CC	CT
93	POS	Siamese	12	FIP		TT	GG	AA	GA	CT	CT	CT	CC	CC	GG	CC	GG	CC	GG	CC	CC
94	POS	British Short Hair	10	FIP		TT	GG	AA	GA	CT	CT	CC	CT	CC	GA	CT	GG	CC	GG	CT	CC
97	POS	Birman	3	FIP		TT	GG	AA	AA	CC	CC	CC	TT	TT	GG	CC	GG	CC	GA	CC	CC
98	POS	Maine Coon	11	FIP		TT	GG	AA	GG	TT	TT	CC	CC	TT	GG	CC	GG	CC	GG	CT	CC
100	POS	Siamese	36	FIP		TT	GG	AA	GG	CC	CC	CC	CC	CC	GG	CC	GG	CC	GG	CC	CC
101	POS	Birman	144	FIP		TT	GG	AA	AA	CT	CT	CC	TT	CT	GA	CC	GG	CC	GG	CC	CC
103	POS	British Short Hair	21	FIP		TT	GG	AA	GG	CC	CC	CC	CC	CC	GG	CC	GG	CC	GA	CC	CT
127	POS	Birman	8	FIP		TT	GG	AA	AA	CC	CC	CC	TT	TT	GG	CC	GG	CC	GG	CC	CC
128	POS	Ragdoll	10	FIP		TT	CC	AA	GA	CT	CT	CC	CT	CT	GG	CC	GG	CC	GG	TT	CC
160	POS	Ragdoll	2	FIP		TT	GC	AA	AA	TT	TT	CT	CC	CT	GG	CC	GG	CC	GG	CT	CC
